# Supplementary material for: Evaluation of the effects of five QTL regions on Fusarium head blight resistance and agronomic traits in spring wheat (Triticum aestivum L.)
Source: PubMed Central journal article supplement — Breed Sci. 2012 Mar 20;62(1):11–7. doi: 10.1270/jsbbs.62.11 (PMC3405959; doi:10.1270/jsbbs.62.11), 2012-03-20
Supplement: 62_11suppl.pdf [file 62_11suppl.pdf]

**Supplemental Table 1.** Means and analysis of variance using a segregating DH population from the cross between KH14 and Sumai3.

| SSR Marker       | Chr. | No. of lines |        | Fsarium damaged grains <sup>a</sup> |        |          | DON <sup>a</sup> |        |         | 2004 FHB severity |               |         | Heading date <sup>a</sup> |        |             | Stem length |             |          | Spike length |        |          | Thousand grain weight <sup>a</sup> |               |         |             |         |
|------------------|------|--------------|--------|-------------------------------------|--------|----------|------------------|--------|---------|-------------------|---------------|---------|---------------------------|--------|-------------|-------------|-------------|----------|--------------|--------|----------|------------------------------------|---------------|---------|-------------|---------|
|                  |      | KH14 allele  | Sumai3 | (% )                                |        | F-value  | ( ppb )          |        | F-value | KH14 allele       | Sumai3 allele | F-value | ( month.day )             |        | ( cm )      |             | ( cm )      |          | ( g )        |        | F-value  | KH14 allele                        | Sumai3 allele | F-value |             |         |
|                  |      |              |        | KH14 allele                         | Sumai3 |          | KH14 allele      | Sumai3 |         |                   |               |         | KH14 allele               | Sumai3 | KH14 allele | Sumai3      | KH14 allele | Sumai3   | KH14 allele  | Sumai3 |          |                                    |               |         | KH14 allele | Sumai3  |
| <i>Xwmc601</i>   | 2DL  | 170          | 62     | 1.55                                | 1.70   | 0.45     | 1485             | 1692   | 0.69    | 12.5              | 9.9           | 0.80    | 6.21                      | 6.22   | 0.67        | 75.6        | 76.5        | 0.08     | 8.60         | 8.42   | 0.37     | 36.3                               | 35.5          | 0.70    |             |         |
| <i>Xgwm608</i>   | 2DL  | 136          | 91     | 1.55                                | 1.66   | 0.26     | 1462             | 1658   | 0.75    | 13.0              | 9.8           | 1.51    | 6.21                      | 6.22   | 0.07        | 75.2        | 76.5        | 0.22     | 8.57         | 8.48   | 0.10     | 36.7                               | 35.0          | ** 4.43 |             |         |
| <i>Xgwm539</i>   | 2DL  | 148          | 84     | 1.60                                | 1.56   | 0.05     | 1526             | 1556   | 0.02    | 14.5              | 7.0           | ** 8.11 | 6.21                      | 6.22   | *           | 1.68        | 74.9        | 77.4     | 0.77         | 8.54   | 8.58     | 0.01                               | 37.3          | 33.9    | ** 16.52    |         |
| <i>Xwmc175</i>   | 2DL  | 144          | 87     | 1.59                                | 1.58   | 0.01     | 1619             | 1409   | 0.86    | 12.1              | 11.3          | 0.09    | 6.21                      | 6.22   | 0.76        | 75.7        | 75.8        | 0.00     | 8.50         | 8.62   | 0.17     | 36.1                               | 36.1          | 0.00    |             |         |
| <i>Xgwm389</i>   | 3BS  | 127          | 100    | 1.83                                | 1.28   | ** 7.07  | 1782             | 1234   | ** 6.05 | 13.5              | 9.3           | *       | 2.85                      | 6.21   | 6.22        | 0.03        | 73.8        | 78.1     | *            | 2.44   | 8.42     | 8.71                               | 1.15          | 35.7    | 36.5        | 0.83    |
| <i>Xgwm533.1</i> | 3BS  | 136          | 96     | 1.81                                | 1.26   | ** 7.22  | 1764             | 1216   | ** 6.08 | 13.0              | 10.0          | *       | 1.88                      | 6.22   | 6.21        | 0.14        | 74.5        | 77.7     | 1.36         | 8.44   | 8.71     | 0.93                               | 35.8          | 36.4    | 0.48        |         |
| <i>Xgwm493</i>   | 3BS  | 144          | 88     | 1.78                                | 1.27   | ** 6.09  | 1719             | 1240   | ** 4.51 | 12.1              | 11.2          | 0.13    | 6.22                      | 6.21   | 0.68        | 74.9        | 77.3        | 0.69     | 8.44         | 8.73   | 1.09     | 35.7                               | 36.7          | 1.45    |             |         |
| <i>Xgwm533.2</i> | 3BS  | 131          | 100    | 1.68                                | 1.47   | 1.10     | 1557             | 1515   | 0.04    | 12.7              | 10.6          | 0.66    | 6.22                      | 6.21   | 0.08        | 75.2        | 76.7        | 0.31     | 8.38         | 8.79   | 2.22     | 36.0                               | 36.1          | 0.01    |             |         |
| <i>Xwmc710</i>   | 4BS  | 126          | 105    | 1.50                                | 1.69   | 0.85     | 1350             | 1767   | ** 3.57 | 13.2              | 10.2          | 1.46    | 6.21                      | 6.22   | ** 2.95     | 69.6        | 83.2        | ** 24.51 | 8.41         | 8.71   | 1.25     | 35.0                               | 37.3          | ** 7.95 |             |         |
| <i>Rht-B1</i>    | 4BS  | 124          | 107    | 1.52                                | 1.67   | 0.60     | 1360             | 1747   | ** 3.09 | 13.5              | 9.8           | *       | 2.15                      | 6.21   | 6.22        | ** 3.52     | 68.7        | 84.0     | ** 31.15     | 8.35   | 8.77     | *                                  | 2.45          | 35.0    | 37.3        | ** 8.13 |
| <i>Xwmc048</i>   | 4BS  | 123          | 106    | 1.47                                | 1.72   | 1.57     | 1344             | 1760   | ** 3.57 | 13.8              | 9.5           | *       | 2.81                      | 6.21   | 6.22        | ** 4.20     | 69.1        | 83.6     | ** 27.54     | 8.30   | 8.81     | ** 3.51                            | 34.9          | 37.4    | ** 8.99     |         |
| <i>Xwmc238</i>   | 4BS  | 113          | 118    | 1.46                                | 1.71   | 1.47     | 1324             | 1747   | ** 3.71 | 13.7              | 10.1          | *       | 2.04                      | 6.21   | 6.22        | ** 4.34     | 69.3        | 81.9     | ** 21.26     | 8.38   | 8.70     | 1.38                               | 35.1          | 37.0    | ** 5.90     |         |
| <i>Xgwm513</i>   | 4BS  | 122          | 105    | 1.48                                | 1.75   | * 1.74   | 1355             | 1771   | ** 3.53 | 12.5              | 10.4          | 0.74    | 6.21                      | 6.22   | ** 3.23     | 70.4        | 82.5        | 19.61    | 8.46         | 8.66   | 0.54     | 35.2                               | 37.1          | ** 5.36 |             |         |
| <i>Xgwm293</i>   | 5AS  | 110          | 121    | 1.92                                | 1.29   | ** 9.54  | 1676             | 1416   | 1.41    | 14.7              | 9.3           | ** 4.64 | 6.21                      | 6.22   | 1.63        | 72.3        | 78.9        | ** 5.82  | 8.09         | 8.96   | ** 10.24 | 35.7                               | 36.4          | 0.91    |             |         |
| <i>Xwmc705</i>   | 5AS  | 108          | 122    | 1.94                                | 1.28   | ** 10.53 | 1699             | 1407   | * 1.76  | 14.8              | 9.2           | ** 5.03 | 6.21                      | 6.22   | 1.56        | 72.1        | 79.1        | ** 6.48  | 8.07         | 8.96   | ** 10.70 | 35.6                               | 36.4          | 0.97    |             |         |
| <i>Xgwm304</i>   | 5AS  | 113          | 118    | 1.90                                | 1.28   | ** 9.61  | 1669             | 1398   | 1.53    | 14.5              | 9.0           | ** 4.93 | 6.21                      | 6.22   | * 2.05      | 72.7        | 78.8        | ** 5.03  | 8.12         | 8.97   | ** 9.86  | 35.7                               | 36.3          | 0.54    |             |         |
| <i>Xgwm508</i>   | 6BS  | 144          | 86     | 1.61                                | 1.55   | 0.08     | 1514             | 1579   | 0.08    | 12.1              | 11.5          | 0.06    | 6.21                      | 6.23   | ** 5.35     | 74.7        | 77.7        | 1.08     | 8.44         | 8.77   | 1.35     | 35.9                               | 36.5          | 0.56    |             |         |
| <i>Xwmc398</i>   | 6BS  | 140          | 81     | 1.69                                | 1.45   | 1.26     | 1558             | 1539   | 0.01    | 12.3              | 10.9          | 0.27    | 6.21                      | 6.22   | ** 6.11     | 75.2        | 77.1        | 0.43     | 8.43         | 8.72   | 1.05     | 36.1                               | 36.0          | 0.01    |             |         |
| <i>Xwmc397</i>   | 6BS  | 148          | 84     | 1.69                                | 1.41   | * 1.81   | 1567             | 1486   | 0.12    | 12.5              | 10.7          | 0.46    | 6.21                      | 6.22   | ** 6.16     | 74.9        | 77.3        | 0.72     | 8.42         | 8.74   | 1.30     | 36.2                               | 35.9          | 0.12    |             |         |
| <i>Xwmc105</i>   | 6BS  | 145          | 82     | 1.70                                | 1.41   | * 1.92   | 1574             | 1503   | 0.10    | 12.6              | 10.5          | 0.64    | 6.21                      | 6.22   | ** 6.54     | 74.7        | 77.7        | 1.16     | 8.43         | 8.78   | 1.54     | 36.1                               | 36.0          | 0.01    |             |         |

\* F-value significantly different from 0 at  $P < 0.05$ ; \*\* F-value significantly different from 0 at  $P < 0.01$

<sup>a</sup>Average of two years (2003,2004)
